# Supplementary material
Source: PubMed Central journal article supplement (PMC4985268)
Supplement: Supp_Fig1.pdf [file Supp_Fig1.pdf]

## Supplementary Data

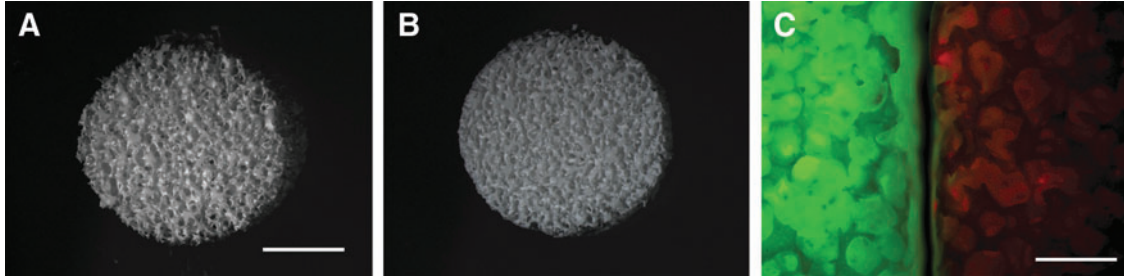

**SUPPLEMENTARY FIG. S1.** Scaffolding material. **(A)** E1001(1k) scaffold. **(B)** E1001(1k)/ $\beta$ -TCP scaffold. **(C)** E1001(1k) and E1001(1k)/ $\beta$ -TCP scaffold after alizarin red staining. Alizarin red-stained  $\beta$ -TCP nodules stained *red* under fluorescence. Scale bar = 2.0 mm **(A, B)**, 500  $\mu$ m **(C)**.
