# Supplementary material
Source: PubMed Central journal article supplement (PMC4985268)
Supplement: Supp_Fig2.pdf [file Supp_Fig2.pdf]

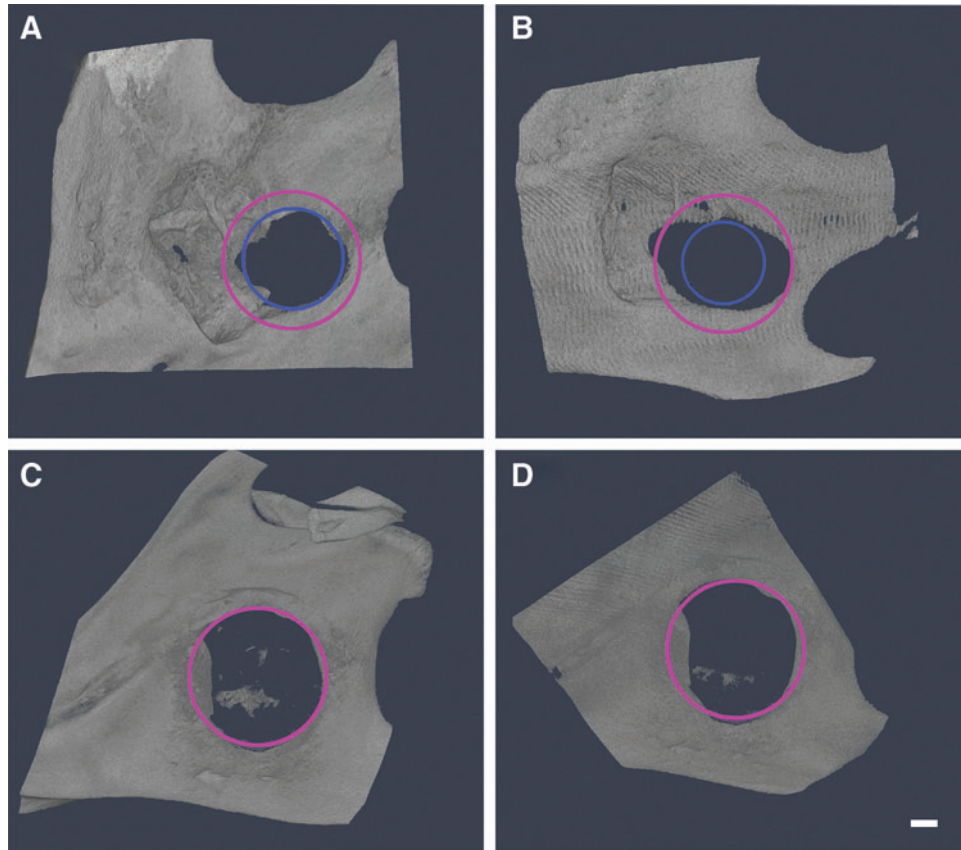

**SUPPLEMENTARY FIG. S2.** Self-healing of mandible defect. Partial healing of empty defect after 3 weeks (A) and 6 weeks (B) postimplantation. The acellular E1001(1k)/ $\beta$ -TCP scaffold-filled defect exhibited a similar size after 3 weeks (C) and 6 weeks (D) postimplantation. *Pink circle* = 5 mm original defect. *Blue circle* = 2.9 mm (A) and 2.4 mm (B).
